# Supplementary material
Source: PubMed Central journal article supplement (PMC3032073)

*AJHG*, Volume 86

Supplemental Data

**Pooled Association Tests for Rare Variants  
in Exon-Resequencing Studies**

Alkes L. Price, Gregory V. Kryukov, Paul I. W. de Bakker, Shaun M. Purcell, Jeff Staples, Lee-Jen Wei, and  
Shamil R. Sunyaev

**Supplemental Tables and Figures**

## Supplemental Tables

### **Table S1. Power of Various Approaches Using Quantitative Phenotypes**

We display results for T1 (1% allele frequency threshold), T5 (5% allele frequency threshold), WE (weighted) and VT (variable threshold) analyses for various values of  $s$  and  $\delta$ . Results are displayed for  $\alpha=0.001$  and  $\alpha=0.05$  significance levels, based on 10,000 independent simulations. The best-performing method(s) are indicated in bold. We note that of 54 pairwise comparisons between VT and one other method, VT performs worse in 6/54 comparisons, with an average reduction in power of 0.003 in those 6 comparisons.

|                                        | T1    | T5           | WE           | VT           |
|----------------------------------------|-------|--------------|--------------|--------------|
| $s=0.0001, \delta=0.125, \alpha=0.001$ | 0.031 | 0.081        | 0.030        | <b>0.109</b> |
| $s=0.0001, \delta=0.125, \alpha=0.05$  | 0.299 | 0.386        | 0.310        | <b>0.432</b> |
| $s=0.0001, \delta=0.25, \alpha=0.001$  | 0.230 | 0.368        | 0.245        | <b>0.487</b> |
| $s=0.0001, \delta=0.25, \alpha=0.05$   | 0.674 | 0.707        | 0.735        | <b>0.803</b> |
| $s=0.0001, \delta=0.5, \alpha=0.001$   | 0.787 | 0.778        | 0.888        | <b>0.926</b> |
| $s=0.0001, \delta=0.5, \alpha=0.05$    | 0.954 | 0.926        | 0.983        | <b>0.985</b> |
| $s=0.001, \delta=0.125, \alpha=0.001$  | 0.017 | <b>0.036</b> | 0.013        | 0.029        |
| $s=0.001, \delta=0.125, \alpha=0.05$   | 0.233 | <b>0.253</b> | 0.220        | 0.249        |
| $s=0.001, \delta=0.25, \alpha=0.001$   | 0.137 | 0.182        | 0.098        | <b>0.204</b> |
| $s=0.001, \delta=0.25, \alpha=0.05$    | 0.547 | 0.503        | 0.543        | <b>0.600</b> |
| $s=0.001, \delta=0.5, \alpha=0.001$    | 0.569 | 0.493        | 0.595        | <b>0.697</b> |
| $s=0.001, \delta=0.5, \alpha=0.05$     | 0.893 | 0.792        | 0.941        | <b>0.948</b> |
| $s=0.01, \delta=0.125, \alpha=0.001$   | 0.001 | 0.001        | 0.001        | <b>0.002</b> |
| $s=0.01, \delta=0.125, \alpha=0.05$    | 0.061 | 0.055        | <b>0.066</b> | <b>0.066</b> |
| $s=0.01, \delta=0.25, \alpha=0.001$    | 0.002 | 0.002        | <b>0.003</b> | 0.002        |
| $s=0.01, \delta=0.25, \alpha=0.05$     | 0.075 | 0.068        | <b>0.083</b> | 0.080        |
| $s=0.01, \delta=0.5, \alpha=0.001$     | 0.004 | 0.003        | <b>0.006</b> | 0.005        |
| $s=0.01, \delta=0.5, \alpha=0.05$      | 0.111 | 0.090        | <b>0.132</b> | 0.128        |

**Table S2**

(a) Power of various approaches using quantitative phenotypes, for a simulation in which phenotypes are independent of selection coefficient. The fraction of functional mutations, i.e. mutations that affect phenotype, was equal to the fraction of mutations with selection coefficient above  $10^{-3}$  (48%), however the functionality of each mutation was independent of the selection coefficient. We display results for T1 (1% allele frequency threshold), T5 (5% allele frequency threshold), WE (weighted), and VT (variable threshold) analyses for  $\alpha=0.001$  and  $\alpha=0.05$  significance levels, based on 10,000 independent simulations.

|                | T1    | T5    | WE    | VT    |
|----------------|-------|-------|-------|-------|
| $\alpha=0.001$ | 0.099 | 0.226 | 0.156 | 0.405 |
| $\alpha=0.05$  | 0.404 | 0.501 | 0.520 | 0.631 |

(b) Value of incorporation of PolyPhen-2 predictions, as a function of the (known) distribution of PolyPhen-2 scores associated to either deep or shallow multiple sequence alignments. Alignments with less than 10 sequences (after PolyPhen-2 filtering for very close homologs) were classified as “shallow”. Alignments with 100 or more sequences were classified as “deep”. We display results for T1 (1% allele frequency threshold), T5 (5% allele frequency threshold), WE (weighted), VT (variable threshold), VTP (VT plus PolyPhen-2), VTP-deep (VT plus PolyPhen-2, deep alignments) and VTP-shallow (VT plus PolyPhen-2, shallow alignments) analyses for  $\alpha=0.001$  and  $\alpha=0.05$  significance levels, based on 10,000 independent simulations. All columns except VTP-deep and VTP-shallow are identical to Table 1. As expected, VTP-deep outperforms VTP-shallow, but even VTP-shallow is substantially better than VT.

|                | T1    | T5    | WE    | VT    | VTP   | VTP-hi | VTP-lo |
|----------------|-------|-------|-------|-------|-------|--------|--------|
| $\alpha=0.001$ | 0.137 | 0.182 | 0.098 | 0.204 | 0.259 | 0.269  | 0.230  |
| $\alpha=0.05$  | 0.547 | 0.503 | 0.543 | 0.600 | 0.686 | 0.696  | 0.639  |

### **Table S3. Power of Various Approaches Using Dichotomous Phenotypes**

We display results for T1 (1% allele frequency threshold), T5 (5% allele frequency threshold), WE (weighted) and VT (variable threshold) analyses for various values of  $s$  and  $\delta$ . Results are displayed for for  $\alpha=0.001$  and  $\alpha=0.05$  significance levels, based on 10,000 independent simulations. The best-performing method(s) are indicated in bold. We note that of 54 pairwise comparisons between VT and one other method, VT performs worse in 6/54 comparisons, with an average reduction in power of 0.002 in those 6 comparisons.

|                                        | T1           | T5           | WE           | VT           |
|----------------------------------------|--------------|--------------|--------------|--------------|
| $s=0.0001, \delta=0.125, \alpha=0.001$ | 0.021        | 0.062        | 0.029        | <b>0.087</b> |
| $s=0.0001, \delta=0.125, \alpha=0.05$  | 0.266        | 0.346        | 0.302        | <b>0.399</b> |
| $s=0.0001, \delta=0.25, \alpha=0.001$  | 0.156        | 0.319        | 0.219        | <b>0.439</b> |
| $s=0.0001, \delta=0.25, \alpha=0.05$   | 0.616        | 0.664        | 0.706        | <b>0.773</b> |
| $s=0.0001, \delta=0.5, \alpha=0.001$   | 0.691        | 0.722        | 0.836        | <b>0.885</b> |
| $s=0.0001, \delta=0.5, \alpha=0.05$    | 0.933        | 0.906        | 0.984        | <b>0.985</b> |
| $s=0.001, \delta=0.125, \alpha=0.001$  | 0.012        | <b>0.026</b> | 0.011        | 0.021        |
| $s=0.001, \delta=0.125, \alpha=0.05$   | 0.207        | 0.227        | 0.203        | <b>0.233</b> |
| $s=0.001, \delta=0.25, \alpha=0.001$   | 0.089        | 0.150        | 0.078        | <b>0.161</b> |
| $s=0.001, \delta=0.25, \alpha=0.05$    | 0.482        | 0.458        | 0.488        | <b>0.533</b> |
| $s=0.001, \delta=0.5, \alpha=0.001$    | 0.443        | 0.427        | 0.474        | <b>0.583</b> |
| $s=0.001, \delta=0.5, \alpha=0.05$     | 0.843        | 0.744        | 0.890        | <b>0.902</b> |
| $s=0.01, \delta=0.125, \alpha=0.001$   | 0.001        | <b>0.002</b> | 0.001        | 0.001        |
| $s=0.01, \delta=0.125, \alpha=0.05$    | 0.060        | 0.059        | 0.061        | <b>0.063</b> |
| $s=0.01, \delta=0.25, \alpha=0.001$    | <b>0.003</b> | <b>0.003</b> | 0.002        | 0.002        |
| $s=0.01, \delta=0.25, \alpha=0.05$     | 0.072        | 0.066        | <b>0.077</b> | 0.074        |
| $s=0.01, \delta=0.5, \alpha=0.001$     | 0.003        | 0.003        | <b>0.004</b> | <b>0.004</b> |
| $s=0.01, \delta=0.5, \alpha=0.05$      | 0.099        | 0.084        | <b>0.111</b> | 0.109        |

**Table S4**

(a) Effect of PolyPhen-2 on power of various approaches using quantitative phenotypes. We display results for T1 (1% allele frequency threshold), T5 (5% allele frequency threshold), WE (weighted), and VT (variable threshold) analyses (each with and without PolyPhen-2) for  $\alpha=0.001$  and  $\alpha=0.05$  significance levels, based on 10,000 independent simulations.

|                | T1        |           | T5        |           | WE        |           | VT        |           |
|----------------|-----------|-----------|-----------|-----------|-----------|-----------|-----------|-----------|
|                | -PolyPhen | +PolyPhen | -PolyPhen | +PolyPhen | -PolyPhen | +PolyPhen | -PolyPhen | +PolyPhen |
| $\alpha=0.001$ | 0.14      | 0.21      | 0.18      | 0.24      | 0.10      | 0.15      | 0.20      | 0.26      |
| $\alpha=0.05$  | 0.55      | 0.69      | 0.50      | 0.62      | 0.54      | 0.65      | 0.60      | 0.69      |

(b) Effect of PolyPhen-2 on power of various approaches using dichotomous phenotypes. We display results for T1 (1% allele frequency threshold), T5 (5% allele frequency threshold), WE (weighted), and VT (variable threshold) analyses (each with and without PolyPhen-2) for  $\alpha=0.001$  and  $\alpha=0.05$  significance levels, based on 10,000 independent simulations.

|                | T1        |           | T5        |           | WE        |           | VT        |           |
|----------------|-----------|-----------|-----------|-----------|-----------|-----------|-----------|-----------|
|                | -PolyPhen | +PolyPhen | -PolyPhen | +PolyPhen | -PolyPhen | +PolyPhen | -PolyPhen | +PolyPhen |
| $\alpha=0.001$ | 0.09      | 0.16      | 0.15      | 0.19      | 0.08      | 0.12      | 0.16      | 0.21      |
| $\alpha=0.05$  | 0.48      | 0.62      | 0.46      | 0.56      | 0.49      | 0.60      | 0.53      | 0.63      |

## Supplemental Figures

**Figure S1. Prevalence of Goldilocks Alleles in Simulations at Different Values of Selection**

**Parameter  $s$**

We consider  $s=0.01$  ( $\log_{10}s=-2$ ),  $s=0.001$  ( $\log_{10}s=-3$ ), or  $s=0.0001$  ( $\log_{10}s=-4$ ). We plot (a) the fraction of all functional SNPs that have frequency between 0.5% and 2%, and (b) the probability that a gene has at least one functional SNP with frequency between 0.5% and 2%, as a function of  $s$ .

(a)

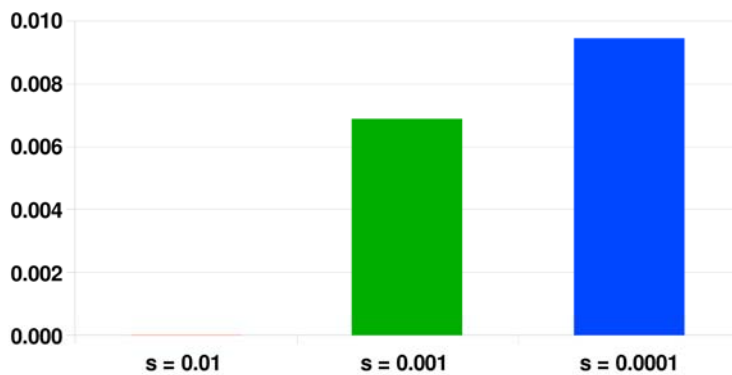

(b)

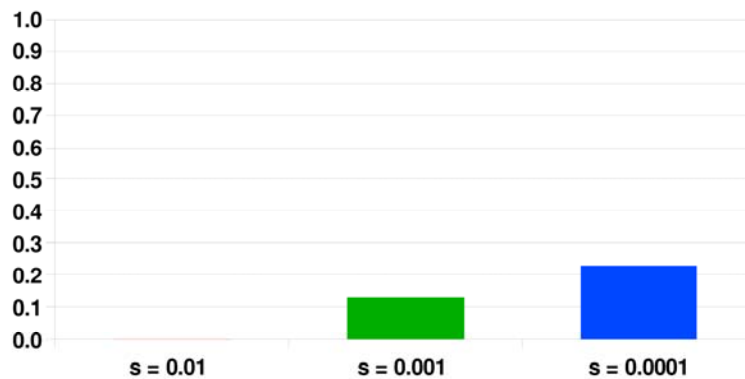

Supplement: mmc1.pdf [file mmc1.pdf]
